# Supplementary material
Source: MDPI journal article supplement (https://www.mdpi.com/2673-6918/1/3/14)
Supplement: s1 [file s1]

Archive with 1 entries (1 files):
- compounds-1437601-supplementary.pdf
